# Supplementary material for: Ionothermal synthesis, magnetic transformation and hydration–dehydration properties of Co(ii)-based coordination polymers
Source: Royal Society of Chemistry journal article supplement (doi:10.1039/c6ra14268k), 2016-01-01
Supplement: c6ra14268k1.pdf [file c6ra14268k1.pdf]

## Supporting Information

# Ionothermal Synthesis, Magnetic Transformation and Hydration-Dehydration Properties of Co(II)-based Coordination Polymers

Wen-Xian Chen,\* Yi-Fen Gao, Pei-Yuan Gao, <sup>a</sup>Qiu-Ping Liu, Gui-lin Zhuang\*,  
Institute of Industrial Catalysis, College of Chemical Engineering, Zhejiang University of Technology, Hangzhou,  
P.R. China 310032.

Email: wxchen@zjut.edu.cn, glzhuang@zjut.edu.cn

### Selected bond lengths (Å) and angles (°) for 1 – 3

**Table S1** Selected bond lengths (Å) and angles (°) for 1 – 3.

| <b>Compound 1</b>                                     |            |                                         |            |                                        |            |                                        |           |
|-------------------------------------------------------|------------|-----------------------------------------|------------|----------------------------------------|------------|----------------------------------------|-----------|
| Co1-O2 <sup>#1</sup>                                  | 1.9407(15) | O2 <sup>#1</sup> -Co1-O8                | 118.09(7)  | O8-Co1-O11 <sup>#2</sup>               | 94.26(7)   | O2 <sup>#1</sup> -Co1-O5               | 94.61(6)  |
| Co1-O8                                                | 1.9408(16) | O5-Co1-O11 <sup>#2</sup>                | 118.37(7)  | O8-Co1-O5                              | 117.22(7)  | O3-N1-O4                               | 123.5(2)  |
| Co1-O11 <sup>#2</sup>                                 | 1.9499(17) | O2 <sup>#1</sup> -Co1-O11 <sup>#2</sup> | 116.23(7)  | O4-N1-C5                               | 117.6(2)   |                                        |           |
| Symmetry code: #1 -x-1,-y-1,-z+1 #2 -x,-y-1,-z+1      |            |                                         |            |                                        |            |                                        |           |
| <b>Compound 2</b>                                     |            |                                         |            |                                        |            |                                        |           |
| Co1-O4                                                | 1.967(3)   | O4-Co1-O8 <sup>#1</sup>                 | 132.23(13) | O8 <sup>#1</sup> -Co1-O5 <sup>#2</sup> | 108.71(13) | O8 <sup>#1</sup> -Co1-O1 <sup>#2</sup> | 94.14(14) |
| Co1-O8 <sup>#1</sup>                                  | 1.976(3)   | O4-Co1-O1 <sup>#2</sup>                 | 105.81(12) | O1 <sup>#2</sup> -Co1-O5 <sup>#2</sup> | 118.19(12) | C13-O1-Co1 <sup>#2</sup>               | 124.6(3)  |
| Co1-O5 <sup>#2</sup>                                  | 1.984(3)   | O4-Co1-O(5) <sup>#2</sup>               | 99.34(12)  | C14-O4-Co1                             | 115.9(3)   |                                        |           |
| Symmetry code #1 -x+1/2,y-1/2,-z+5/2 #2 -x+1,-y,-z+3  |            |                                         |            |                                        |            |                                        |           |
| <b>Compound 3</b>                                     |            |                                         |            |                                        |            |                                        |           |
| Co1-O7                                                | 2.0596(18) | Co1-O9 <sup>#1</sup>                    | 2.0858(16) | Co2-O9                                 | 2.0736(16) | O7-Co1-O7 <sup>#1</sup>                | 180.00(5) |
| Co1-O7 <sup>#1</sup>                                  | 2.0596(18) | Co1-O9                                  | 2.0858(16) | Co2-O3 <sup>#2</sup>                   | 2.1416(18) | O7-Co1-O2                              | 91.70(8)  |
| Co1-O2                                                | 2.0848(17) | Co2-O1 <sup>#1</sup>                    | 2.0159(18) | Co2-O4 <sup>#2</sup>                   | 2.1815(17) | O7 <sup>#1</sup> -Co1-O2               | 88.30(8)  |
| Co1-O2 <sup>#1</sup>                                  | 2.0848(17) | Co2-O8 <sup>#1</sup>                    | 2.0351(19) | Co2-O10                                | 2.278(2)   | O7-Co1-O2 <sup>#1</sup>                | 88.30(8)  |
| O1 <sup>#1</sup> -Co2-O9                              | 97.92(7)   | O1 <sup>#1</sup> -Co2-O3 <sup>#2</sup>  | 95.18(6)   | O7 <sup>#1</sup> -Co1-O2 <sup>#1</sup> | 91.70(8)   | O9-Co2-O3 <sup>#2</sup>                | 158.46(7) |
| O8 <sup>#1</sup> -Co2-O9                              | 99.21(7)   | O8 <sup>#1</sup> -Co2-O3 <sup>#2</sup>  | 95.73(7)   | O2-Co1-O2 <sup>#1</sup>                | 180.00(5)  | O1 <sup>#1</sup> -Co2-O4 <sup>#2</sup> | 155.75(7) |
| O7-Co1-O9 <sup>#1</sup>                               | 88.58(7)   | O8 <sup>#1</sup> -Co2-O4 <sup>#2</sup>  | 88.98(8)   | O2-Co1-O9 <sup>#1</sup>                | 93.90(7)   | O3 <sup>#2</sup> -Co2-O4 <sup>#2</sup> | 60.95(6)  |
| O7 <sup>#1</sup> -Co1-O9 <sup>#1</sup>                | 91.42(7)   | O9-Co2-O4 <sup>#2</sup>                 | 103.75(7)  | O2 <sup>#1</sup> -Co1-O9 <sup>#1</sup> | 86.10(7)   | O1 <sup>#1</sup> -Co2-O10              | 96.62(8)  |
| O7 <sup>#1</sup> -Co1-O9                              | 88.58(7)   | O8 <sup>#1</sup> -Co2-O10               | 155.60(8)  | O9 <sup>#1</sup> -Co1-O9               | 180.00(5)  | O3 <sup>#2</sup> -Co2-O10              | 102.08(7) |
| O2 <sup>#1</sup> -Co1-O9                              | 93.90(7)   | O9-Co2-O10                              | 59.51(6)   | O1 <sup>#1</sup> -Co2-O8 <sup>#1</sup> | 98.26(8)   | O4 <sup>#2</sup> -Co2-O10              | 85.30(7)  |
| Symmetry code: #1 -x-1,-y,-z+2 #2 -x-1/2,y+1/2,-z+5/2 |            |                                         |            |                                        |            |                                        |           |

## 2. Other Characterizations

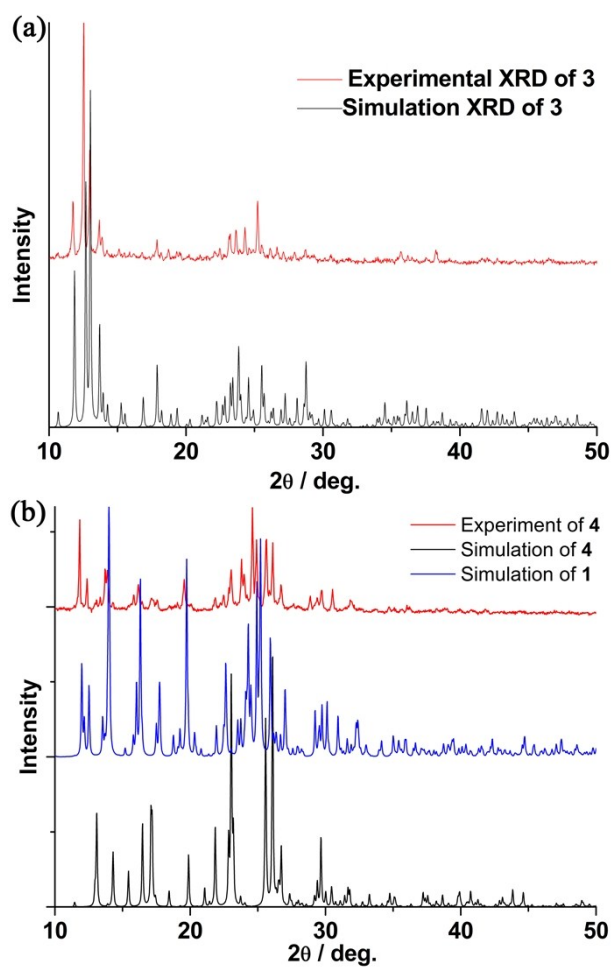

Figure S1 PXRD curve of 3(a) and 4(b)

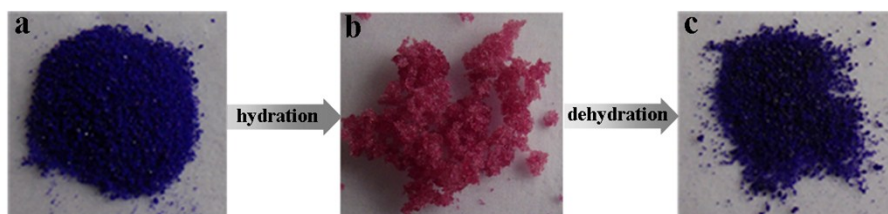

Fig. S2 Photograph representation of the hydration and dehydration processes of compound 2.

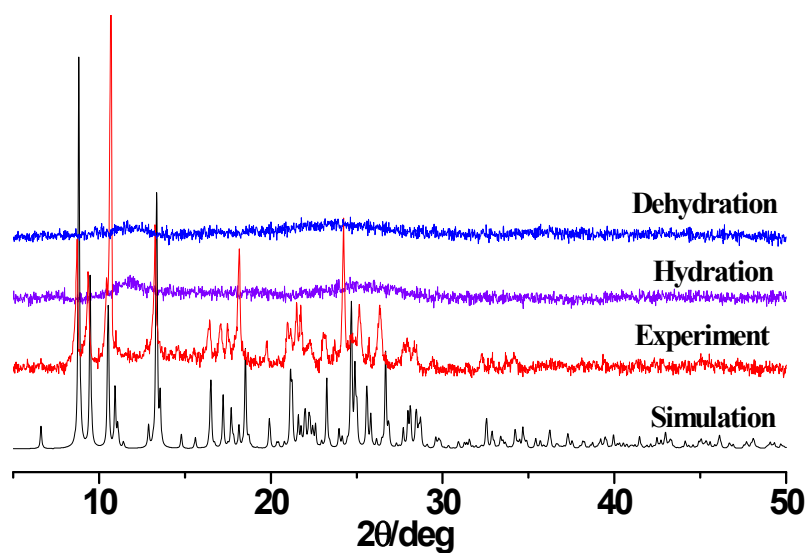

Figure S3. PXRD patterns of **2** on the process of the hydration and dehydration, together with the corresponding simulation according to single-crystal structural determinations.

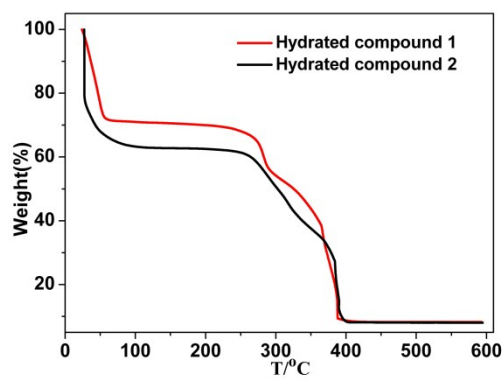

Figure S4. TGA curve for the hydrated **1** and **2**.

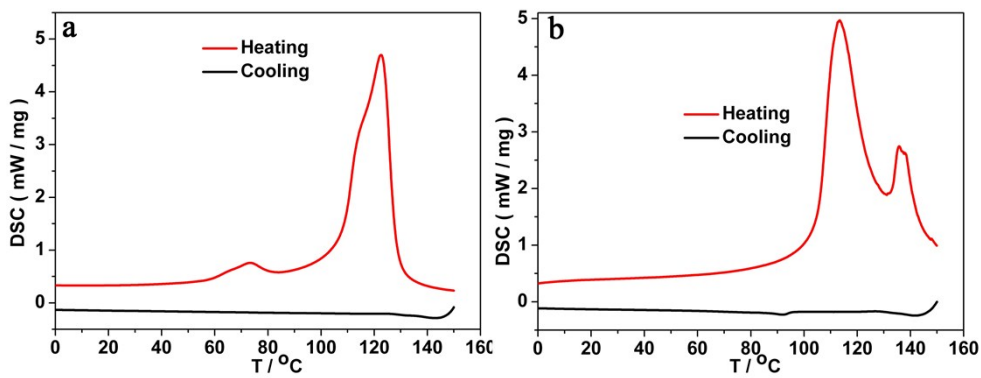

Figure S5. DSC plot of **1b** (a) and **2b** (b).

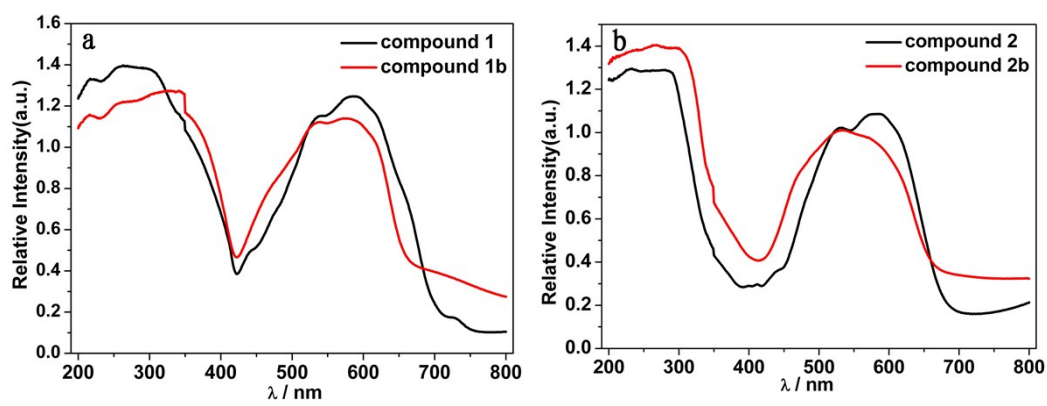

Figure S6. Solid state UV-Vis spectra of **1**, **1b**, **2** and **2b**.
